# Supplementary material for: Cognitive Trajectories in Subjective Cognitive Decline: Identifying Modifiable Risks and Developing a Web-Based Assessment Tool for Personalized Prevention
Source: Research Square preprint supplement (doi:10.21203/rs.3.rs-8588528/v1), 2026-02-02
Supplement: Supplementary file 1 [file 8c1afb7a8c3e13951de41861.docx]

Supplementary Material Appendix A: Online Cognitive Decline Risk Assessment Tool

### **Introduction**

This Online Risk Assessment Tool was developed based on a longitudinal study using data from the China Health and Retirement Longitudinal Study (CHARLS, 2011-2020). The study employed Latent Class Growth Analysis (LCGA) to identify three distinct cognitive trajectories in older adults with Subjective Cognitive Decline (SCD): **Stable**, **Slow Decline**, and **Rapid Decline**.

The tool aims to translate the complex multinomial logistic regression model into a user-friendly, interactive interface. By inputting modifiable risk factors (e.g., lifestyle, health status), clinicians and individuals can calculate the personalized probability of following each cognitive trajectory over the next decade, facilitating early risk stratification and targeted intervention.

### **Model Specifications**

The core algorithm utilizes a Multinomial Logistic Regression model. The "Stable" group serves as the reference category. The tool calculates the Log-Odds of belonging to the "Slow Decline" or "Rapid Decline" groups.Table A1 lists the regression coefficients (*β*) extracted from the tool's JavaScript source code, which are used to construct the linear predictors.

**Table A1. Regression Coefficients (*β*) Used in the Tool**

| Variable | Code | Coeff. Slow Decline (*βslow*) | Coeff. Rapid Decline (*βrapid*) |
| --- | --- | --- | --- |
| Intercept | intercept | 1.687 | 1.918 |
| Sociodemographic | | | |
| Gender (Male) | gender | -0.191 | -0.701 |
| Marital Status (Married) | marry | 0.094 | -0.153 |
| Education (Ordinal) | edu | -0.841 | -0.977 |
| Health & Function | | | |
| Disability | disability | 0.350 | 0.357 |
| Chronic Diseases (Ordinal) | disease | -0.096 | -0.126 |
| ADL Impairment | adl | 0.038 | 0.016 |
| IADL Impairment (0-5) | iadl | 0.150 | 0.345 |
| History of Falls | fall_down | 0.014 | 0.240 |
| Lifestyle | | | |
| BMI: Underweight (<18.5) | bmi_0 | 0.321 | 0.494 |
| BMI: Obese (≥24.0) | bmi_2 | 0.066 | 0.210 |
| Physical Activity (Any) | PhysicalActivity | -0.308 | -0.949 |
| Exercise: None | physical_0 | 0.298 | 0.114 |
| Exercise: Excessive | physical_2 | 0.235 | 0.358 |
| Smoking | smoke | 0.157 | 0.265 |
| Alcohol Consumption | drink | 0.058 | 0.152 |
| Meals (>3/day) | meals | 0.168 | 0.001 |
| Social & Cognitive | | | |
| Social Activity | socialActivity | -0.445 | -0.789 |
| Brain Activity | brainActivity | -0.431 | -0.954 |
| Voluntary Activity | voluntaryActivity | -0.354 | -0.526 |
| Internet Use | internet | -0.352 | -1.055 |
| Tidy Home | clear | -0.474 | -0.582 |
| Sleep & Psych | | | |
| Depression | depression | 0.190 | 0.347 |
| Night Sleep (Hours) | nightSleep | 0.187 | 0.353 |
| Nap Duration (>60 min) | napSleep | -0.271 | -0.686 |

### **Calculation Algorithms**

The tool first calculates two Linear Predictors (*LP*):

Where represents the encoded input variables (see Section 4)

Probabilities (*P*) are then derived using the Softmax Function:

### **Variable Encoding**

Input values from the user interface are mapped to numerical codes as follows:

**Binary Variables (0/1):**

Gender: Female=0, Male=1

Marital: Other=0, Married/Partnered=1

Disability/ADL/Falls/Smoke/Drink/Depression/Internet/Tidy/Social/Brain/Voluntary/Any Phys Activity: No=0, Yes=1

Nap: ≤60 min=0, >60 min=1

Meals: ≤3=0, >3=1

Ordinal Variables:

Education: Illiterate=0, Primary=1, Middle=2, High School+=3

Chronic Diseases: None=0, One=1, Two or more=2

**Continuous Variables:**

IADL: Sum of checked difficulties (0-5)

Night Sleep: Number of hours (e.g., 7.5)

Dummy Variables:

BMI: Normal=Reference; Underweight (bmi_0=1); Obese (bmi_2=1).

Exercise Intensity: Moderate=Reference; None (physical_0=1); Excessive (physical_2=1).

### **User Interface & Usage**

The tool interface consists of:

**Input Form**: Categorized into Sociodemographic, Health/Function, Lifestyle, Social/Cognitive, and Sleep/Psychological sections.

**Calculate Button:** Triggers the risk scoring algorithm.

**Results Display:**

Probability Bars: Visualizes the likelihood (%) for each of the three trajectories.

Risk Level: Classifies risk (Low/Medium/High) based on the highest probability.

Personalized Recommendations: Dynamically generated advice based on specific risk factors identified in the user's input (e.g., specific advice for IADL impairment or insufficient sleep).

### **Availability**

The tool is encapsulated as a standalone HTML5 file, compatible with modern web browsers on both desktop and mobile devices.

File Name: Cognitive_Risk_Assessment_Tool.html

### **Disclaimer**

This tool is for educational and research purposes only. It provides statistical probability predictions based on population cohort data and does not constitute a medical diagnosis. Please consult a healthcare professional for any concerns regarding cognitive health.
